# Supplementary material
Source: Springer Nature journal article supplement (https://www.springermedizin.de/resource/supplementary/13024_2008_52_MOESM1_ESM.pdf/9643278)

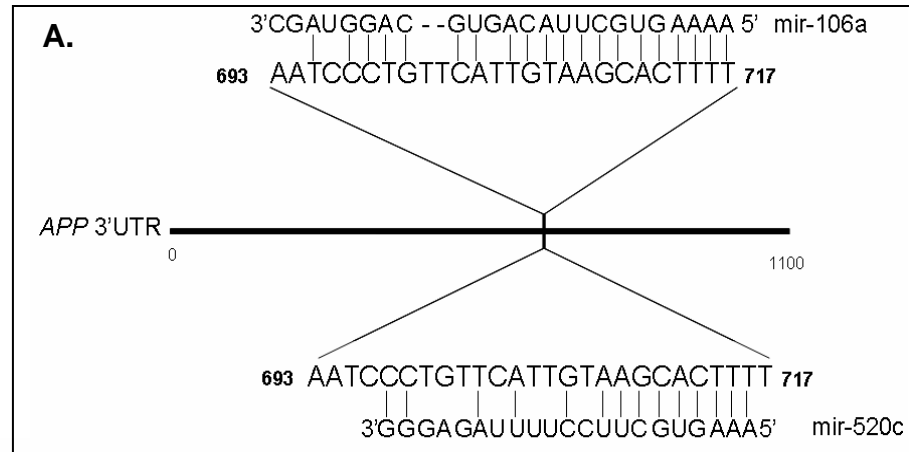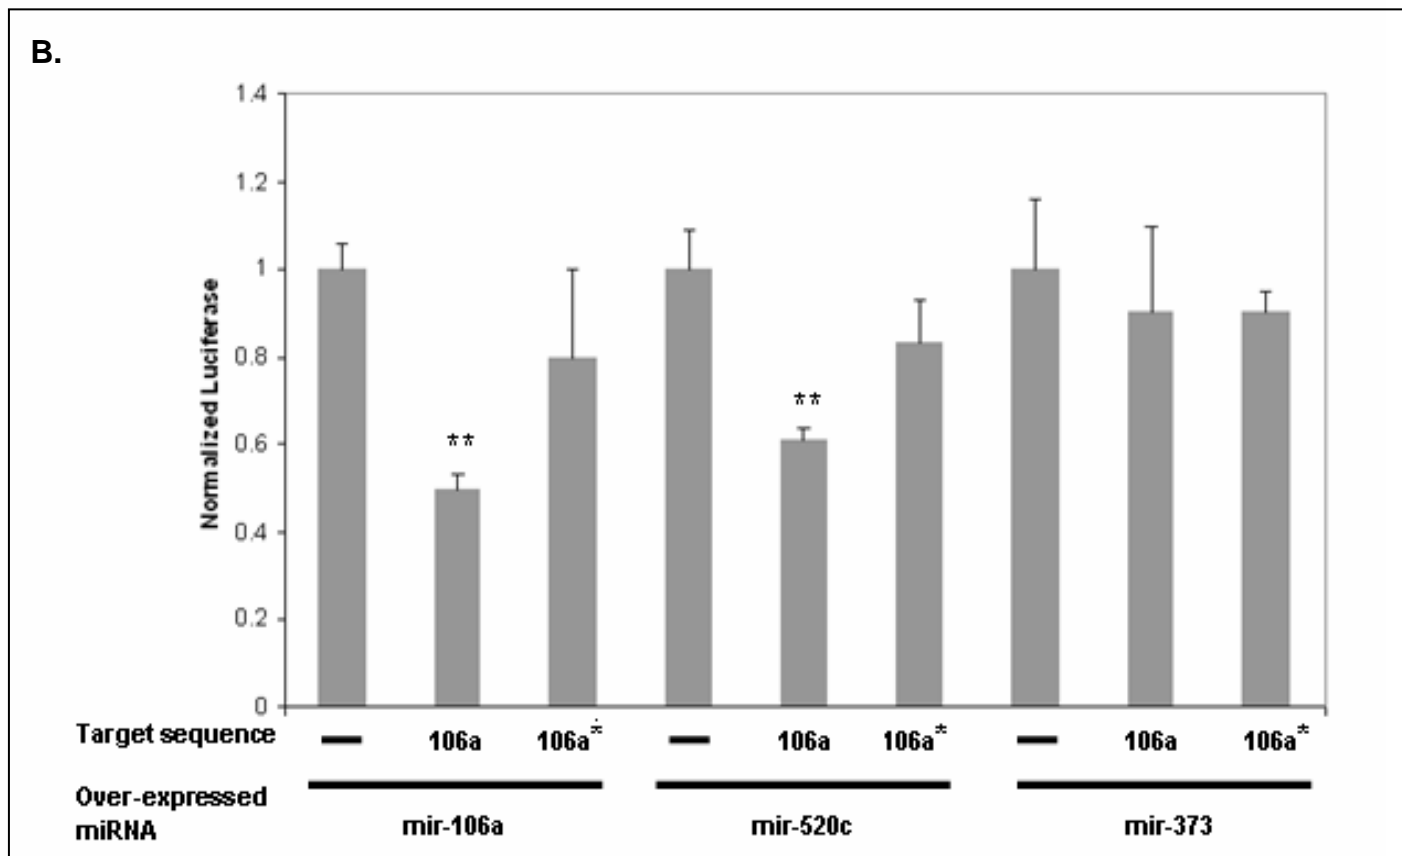

Supplement: MOESM1 [file 9643278]
